# Supplementary material
Source: Research Square preprint supplement (doi:10.21203/rs.3.rs-8972271/v1)
Supplement: Supplementary file 1 [file c06f95b8f946fa408302b5a0.xlsx]

## Sheet: Total TPM
	viruse species	wild	CBG	LBG
1	Acanthocystis turfacea Chlorella virus NE-JV-3	0	0	0.35216
2	Paramecium bursaria Chlorella virus A1	0	0	0.521977
3	Paramecium bursaria Chlorella virus NE-JV-1	0.534995	0	0
4	Pestivirus A	0.12293	1.65134	1.75817
5	Pestivirus B	0	0	0.442141
6	Fowlpox virus	0.0277965	0.345552	0.99318
7	Bovine picobirnavirus	0	1.319	0
8	Chicken picobirnavirus	0.549721	1.89314	1.9108
9	Dromedary picobirnavirus	0	0.541112	0
10	Feline picobirnavirus	0.119803	0	0.407393
11	Fox fecal picobirnavirus	0	0	1.02121
12	Marmot picobirnavirus	1.53849	2.96195	2.99226
13	Microtus picobirnavirus V-111/USA/2008	0	0	0.160565
14	Mongoose picobirnavirus	0	0.836499	1.03466
15	Otarine picobirnavirus	0	0.891342	0.885205
16	Picobirnavirus 504	0.522051	0	0.835396
17	Picobirnavirus Equ1	0	0.751477	0
18	Picobirnavirus Equ2	0	0	0.393641
19	Picobirnavirus mouse/M-58/USA/2008	0	0	0.469188
20	Picobirnavirus sp.	0.748536	2.48103	2.48662
21	Porcine picobirnavirus	0	0.735377	0
22	Rabbit picobirnavirus	0	0.43078	0
23	Rat picobirnavirus	0.0666441	1.02406	0
24	Tasmanian devil-associated picobirnavirus 5	0	0	0.122416
25	uncultured picobirnavirus	0	0	0.182788
26	Orthohepevirus A	0	0.238087	0
27	Orthohepevirus C	0	3.18673	0
28	Cyprinid herpesvirus 2	0	0.38785	0
29	Cyprinid herpesvirus 3	0.950072	0	0
30	Macacine betaherpesvirus 3	0	1.63803	2.72148
31	Human gammaherpesvirus 4	3.31097	3.04349	2.75787
32	Meleagrid alphaherpesvirus 1	0	0.585252	0
33	Ateline gammaherpesvirus 3	0.629344	0	0
34	Human betaherpesvirus 6	0.272255	0.892643	1.1811
35	Human betaherpesvirus 6B	0.174627	0	0.407156
36	Human alphaherpesvirus 2	0.485623	2.42323	1.52355
37	Monodontid alphaherpesvirus 1	0	0.711805	0.959463
38	Mimivirus U306	0.524728	0	0
39	Mimivirus sp. SH	0.0777932	0	0
40	Avian orthoavulavirus 1	3.36926	2.82937	1.46774
41	Human respirovirus 1	0	1.21618	0.00826419
42	Macaca fascicularis chapparvovirus	0	2.59877	0
43	Ursus americanus chapparvovirus	0	0	0.502604
44	Sapporo virus	0	0	0.693019
45	Limnipivirus A	0.391337	0	0
46	Rosavirus A	0	0.902586	0
47	Rosavirus B	0	1.0341	0
48	Fowl aviadenovirus C	0	0	0.541967
